# Supplementary material
Source: PubMed Central journal article supplement (PMC4789922)
Supplement: aikl000694.wt1_default.pdf [file aikl000694.wt1_default.pdf]

**Web table 1: Hospital response rates in European countries**

| <b>Country</b>     | <b>Eligible hospitals</b> | <b>Target number of hospitals</b> | <b>Number of hospitals invited</b> | <b>Number of hospitals in general study</b> | <b>Number of hospitals in patient survey</b> | <b>Response rate</b> |
|--------------------|---------------------------|-----------------------------------|------------------------------------|---------------------------------------------|----------------------------------------------|----------------------|
| <b>Belgium</b>     | 104                       | 30                                | 104                                | 56*                                         | 51                                           | 53.85                |
| <b>England</b>     | 135                       | 32                                | 62                                 | 32*                                         | -                                            | 51.61                |
| <b>Finland</b>     | 49                        | 34                                | 34                                 | 32*                                         | 32                                           | 94.12                |
| <b>Germany</b>     | 1104                      | 31                                | 100                                | 49                                          | 13                                           | 49.00                |
| <b>Greece</b>      | 110                       | 29                                | 57                                 | 24                                          | 17                                           | 42.11                |
| <b>Ireland</b>     | 33                        | 33                                | 33                                 | 30                                          | 10                                           | 90.91                |
| <b>Netherlands</b> | 65                        | 30                                | 62                                 | 23*                                         | -                                            | 37.10                |
| <b>Norway</b>      | 36                        | 36                                | 36                                 | 35                                          | -                                            | 97.22                |
| <b>Poland</b>      | 195                       | 30                                | 32                                 | 30                                          | 30                                           | 93.75                |
| <b>Spain</b>       | 185                       | 34                                | 37                                 | 33                                          | 13                                           | 89.19                |
| <b>Sweden</b>      | N/A                       | N/A                               | N/A                                | 79                                          | -                                            |                      |
| <b>Switzerland</b> | 88                        | 35                                | 41                                 | 35                                          | 34                                           | 85.37                |
| <b>Total</b>       | 2104                      | 354                               | 598                                | 459                                         | 200                                          | 63.55**              |

\*Counts include multiple facility hospital groups and may differ from counts of individual hospitals in sample.

\*\* Rate calculated without Sweden.
